# Supplementary material for: Caveolae in Rabbit Ventricular Myocytes: Distribution and Dynamic Diminution after Cell Isolation
Source: PubMed Central journal article supplement (PMC5653872; doi:10.1016/j.bpj.2017.07.026), 2017-09-05

**Biophysical Journal, Volume 113**

**Supplemental Information**

**Caveolae in Rabbit Ventricular Myocytes: Distribution and Dynamic Diminution after Cell Isolation**

**Rebecca A.B. Burton, Eva A. Rog-Zielinska, Alexander D. Corbett, Rémi Peyronnet, Ilona Bodi, Martin Fink, Judith Sheldon, Andreas Hoenger, Sarah C. Calaghan, Gil Bub, and Peter Kohl**

## Supplementary Material

**Supplementary Figure S1.** Whole cell Cav-3 protein levels are reduced after 8h, as shown by Western blot of isolated cell extracts (left, n = 3 cell isolations; data analysed using ANOVA, significance indicated for the overall effect of time) and measurements of fluorescence intensity in isolated cells (right, n = 18 cells from 3 isolations for each time point; data analysed using ANCOVA, # p=0.002 vs 0h; scale bar = 20  $\mu$ m).

Whether this is indicative of internalisation and protein degradation, or loss to the extracellular space, requires further elucidation.

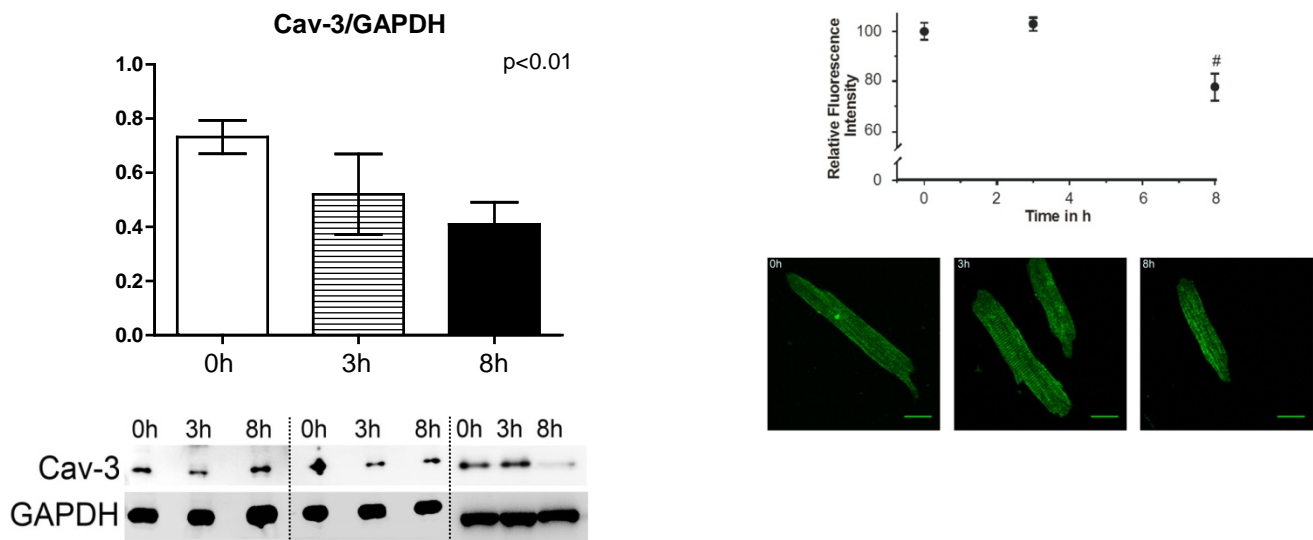

Supplement: mmc1.pdf [file mmc1.pdf]
